# Supplementary material
Source: publisher figshare collection journal article supplement (https://diabetesjournals.figshare.com/articles/dataset/_/25664538)
Supplement: Supplementary file 1 [file 1]

Supplementary Table 1 - Clinical characteristics of the participants divided by sex.

|                                          | Men                 | Women                | p value |
|------------------------------------------|---------------------|----------------------|---------|
| n                                        | 43                  | 41                   |         |
| age (years)                              | 65.0 (51.0, 73.0)   | 62.0 (48.0, 73.0)    | 0.64    |
| BMI (kg/m <sup>2</sup> )                 | 24.8 (21.9, 29.7)   | 24.5 (20.87, 28.4)   | 0.67    |
| Pancreas attenuation (HU)                | 41.1 (30.7, 45.3)   | 38.5 (34.61, 44.5)   | 0.96    |
| Liver attenuation (HU)                   | 55.1 (45.6, 60.6)   | 58.2 (54.65, 65.2)   | 0.04    |
| Spleen attenuation (HU)                  | 49.8 (45.55, 52.5)  | 48.3 (46.10, 51.2)   | 0.64    |
| Skeletal muscle attenuation (HU)         | 48.0 (41.56, 53.7)  | 47.0 (42.72, 51.5)   | 0.62    |
| Renal parenchyma attenuation (HU)        | 34.9 (31.7, 36.8)   | 33.6 (31.9, 36.0)    | 0.45    |
| Renal sinus fat (cm <sup>3</sup> )       | 6.0 (2.2, 10.8)     | 2.9 (1.0, 5.0)       | 0.004   |
| Visceral fat area (cm <sup>2</sup> )     | 145.6 (92.4, 209.6) | 102.7 (71.6, 149.7)  | 0.01    |
| Subcutaneous fat area (cm <sup>2</sup> ) | 140.2 (98.6, 204.0) | 187.5 (122.6, 240.8) | 0.04    |
| Type 2 diabetes mellitus (patients)      | 32                  | 25                   | 0.24    |

Values are median (first quartile, third quartile) for continuous variables and number of participants for categorical variables. Kruskal-Wallis test was used to calculate p-values.
