# Supplementary material
Source: publisher figshare collection journal article supplement (https://diabetesjournals.figshare.com/articles/dataset/_/25664538)
Supplement: Supplementary file 2 [file 1]

Patients who were hospitalized between June 2021 and August 2022 and who had undergone abdominal CT scanning during hospitalization or within 3 months before admission (n=134)

Excluded (n=50)

**Pancreatic diseases (n=27)**

Pancreatic tumor  
Pancreatic neuroendocrine tumor  
Pancreatitis

**Kidney diseases (n=3)**

Kidney cancer  
End stage renal disease

**Acute stage of infection (n=4)**

**Liver diseases (n=5)**

Autoimmune hepatitis  
Hepatitis B  
Liver cirrhosis

**Adrenal diseases (n=11)**

Cushing's syndrome  
Pheochromocytoma  
Use of glucocorticoid ( $\geq 10$ mg)

Analyzed (n=84)

**Supplementary Figure 1** - Flow chart of the recruitment of participants.

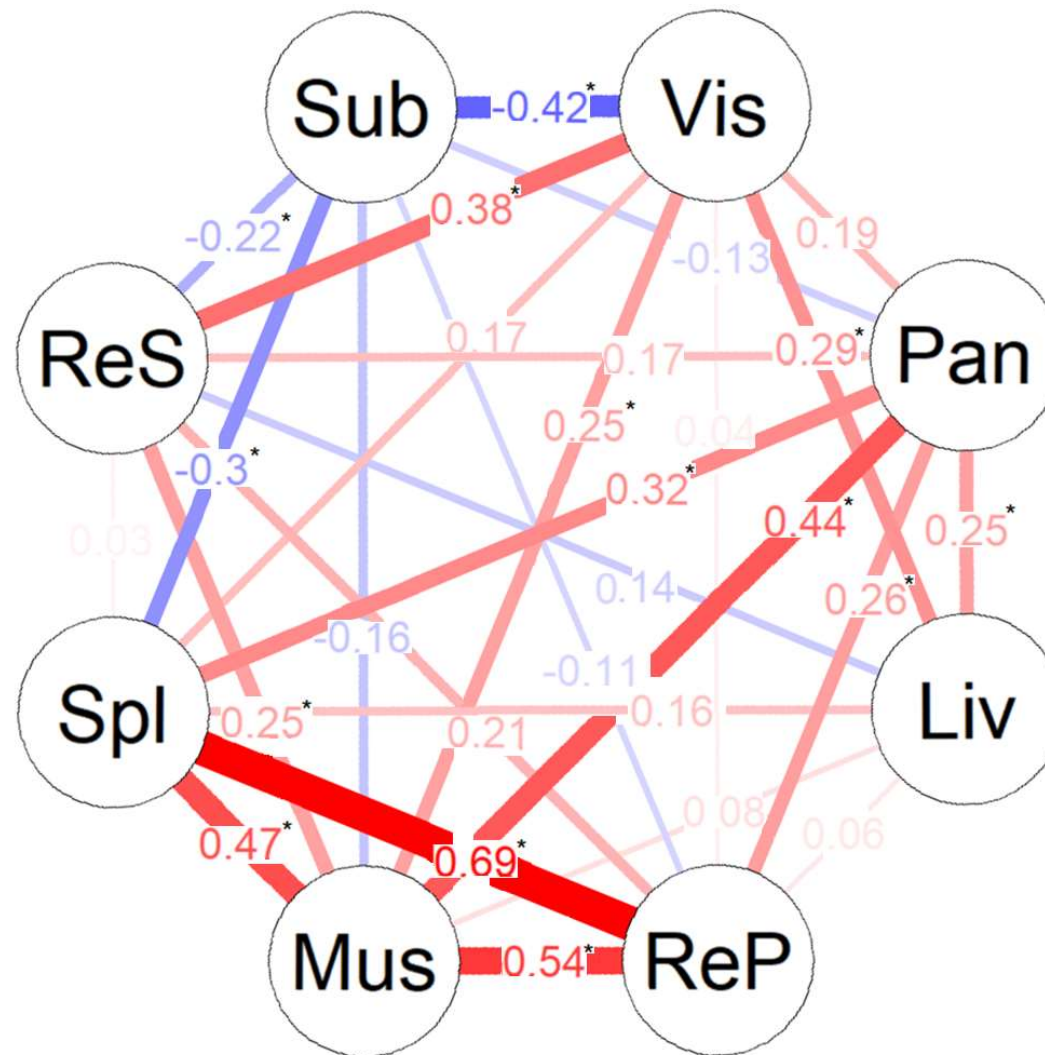

**Supplementary Figure 2** - Partial correlation between visceral fat, subcutaneous fat, and each intra- and peri-organ fat. Vis, visceral fat; Pan, pancreas fat; Liv, liver fat; ReP, renal parenchyma fat; Mus, skeletal muscle fat; Spl, spleen fat; ReS, renal sinus fat; Sub, subcutaneous fat. Numerical values represent correlation coefficients. The thickness of the line increases according to the magnitude of the correlation coefficient. Asterisks indicate  $P < 0.05$ .

Men (n=43)

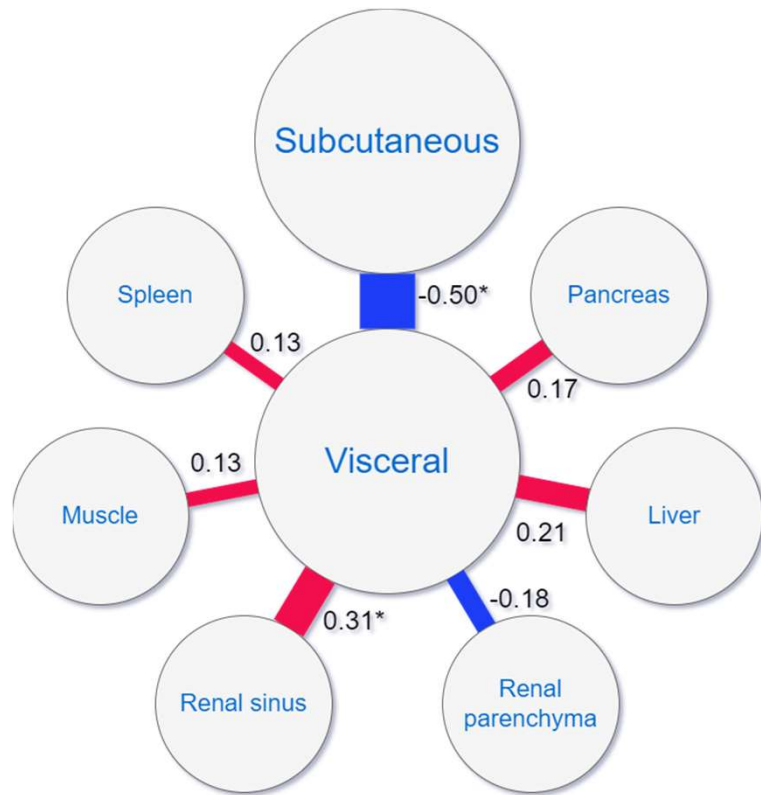

Women (n=41)

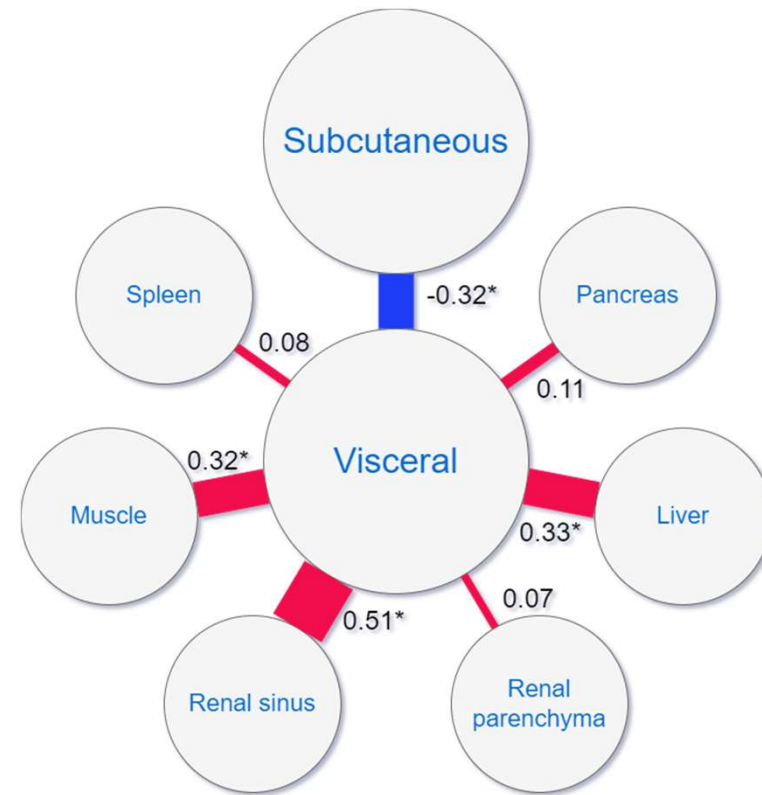

**Supplementary Figure 3** - Partial correlation of visceral fat, subcutaneous fat, and each intra- and peri-organ fat divided by sex. Numerical values represent correlation coefficients. The thickness of the line increases according to the magnitude of the correlation coefficient. Asterisks indicate  $P < 0.05$ .
